# Supplementary material for: Spatio-temporal modeling of signaling protein recruitment to EGFR
Source: Springer Nature journal article supplement (doi:10.1186/1752-0509-4-57), 2010-05-06

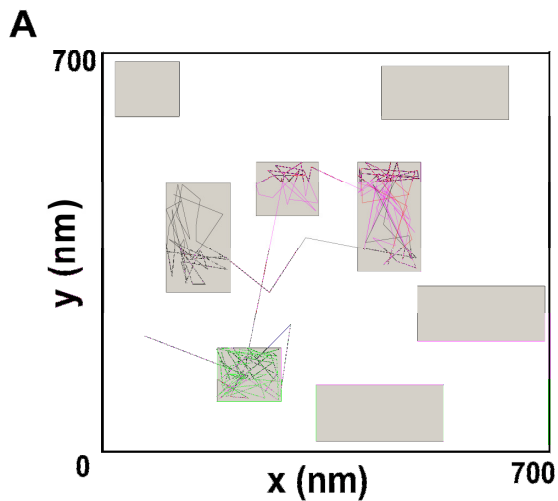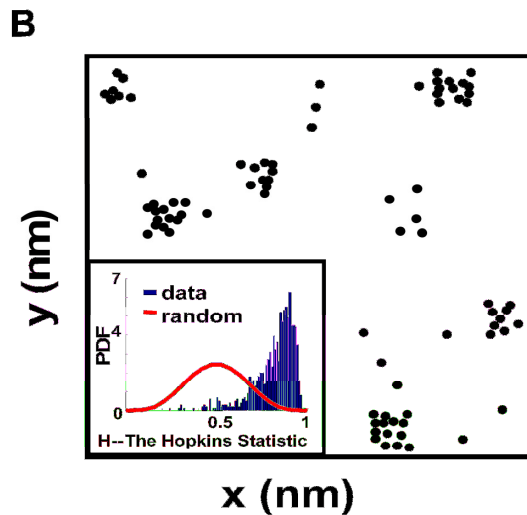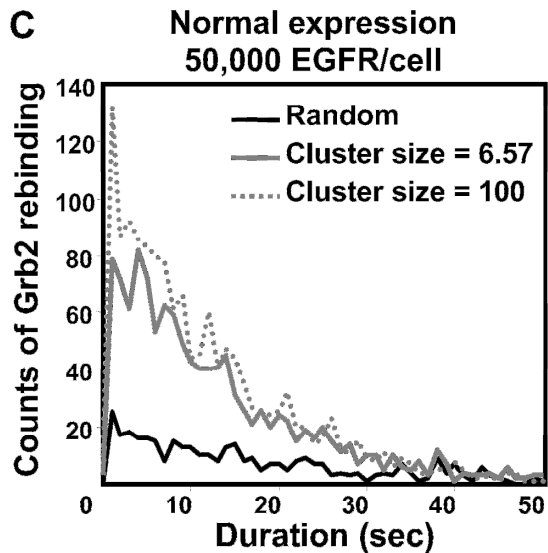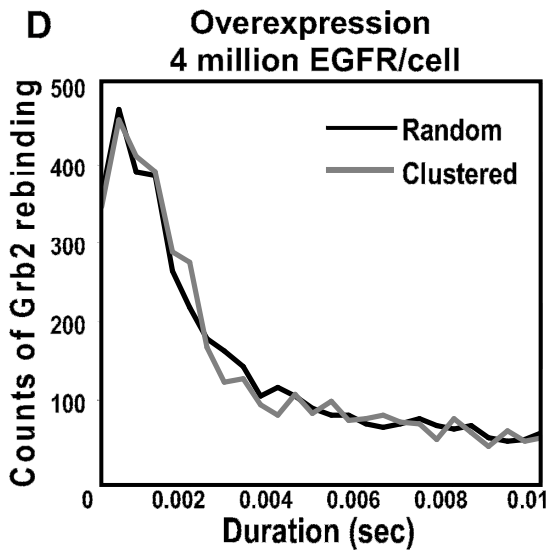

Supplement: 12918_2009_446_MOESM4_ESM.pdf [file 12918_2009_446_MOESM4_ESM.pdf]
